# Supplementary material for: RNA Binding Properties of the Ty1 LTR-Retrotransposon Gag Protein
Source: MDPI journal article supplement (doi:10.3390/ijms22169103), 2021-08-23
Supplement: s1 [file s1]

## SUPPLEMENTARY DATA 1

### RNA binding properties of the Ty1 LTR-retrotransposon Gag protein

Julita Gumna, Angelika Andrzejewska-Romanowska, David J. Garfinkel and Katarzyna Pachulska-Wieczorek

**Figure S1.** Raw MST traces for Ty1 Gag-p49 interactions with mTy1 RNA (**A**), non-Psi Ty1 RNA (**B**), 18S rRNA (**C**), and  $\Delta$ S1a RNA (**D**) at 150mM NaCl.

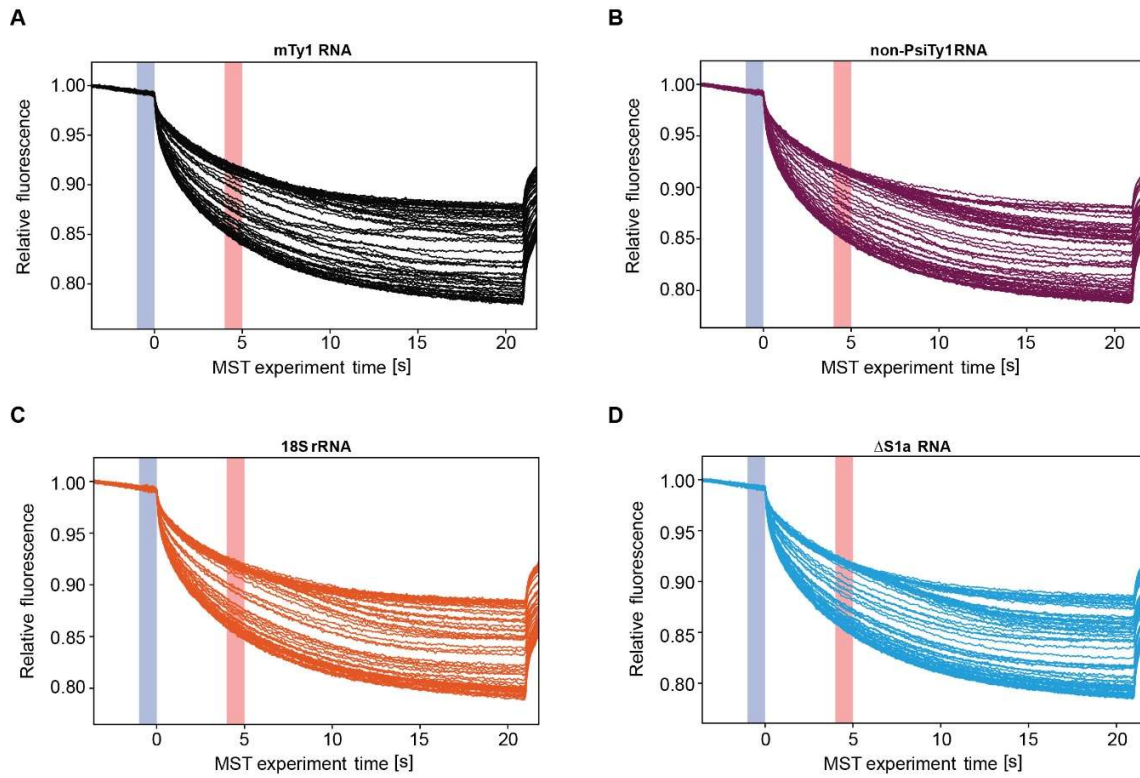

**Figure S2.** Impact of a large excess of tRNA on Ty1 Gag-RNA binding. Dose-response binding curves of Ty1 Gag-p49 to mTy1 RNA (black) and 18S rRNA (orange) in the presence (dashed lines) or absence (solid lines) of total *E.coli* tRNA in ~133-fold molar excess. Lines represent fits of the data points using the Hill equation. The excess of tRNA resulted in 5.2-fold and 5.7-fold increase in  $K_D$  value for mTy1 RNA binding and for 18S rRNA, respectively ( $K_D$  928.7nM and 1445.7nM).

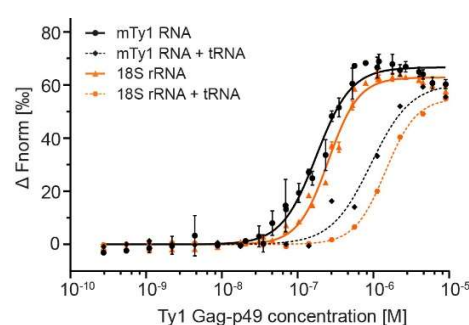

**Table S1.** Impact of buffer ionic strength on Ty1 Gag-RNA interactions analyzed by EMSA. Binding parameters were obtained based on quantitative analysis of gel images. Mean  $\pm$  SD of  $K_D$  from at least 3 independent EMSA experiments.

|                         | $K_D$ [nM]          | $n_H$ | $K_D$ [nM]          | $n_H$ | $K_D$ [nM]           | $n_H$ | $K_D$ [nM]           | $n_H$ |
|-------------------------|---------------------|-------|---------------------|-------|----------------------|-------|----------------------|-------|
|                         | 150 mM NaCl         |       | 300 mM NaCl         |       | 500 mM NaCl          |       | 800 mM NaCl          |       |
| <b>mTy1 RNA-Gag-p49</b> | 88.5<br>$\pm$ 3.6   | 1.5   | 136.7<br>$\pm$ 5.6  | 2.2   | 212.4<br>$\pm$ 27.4  | 1.5   | 454.0<br>$\pm$ 133.5 | 1.5   |
| <b>18S rRNA-Gag-p49</b> | 261.5<br>$\pm$ 14.2 | 2.8   | 551.8<br>$\pm$ 98   | 1.9   | 711.7<br>$\pm$ 307.9 | 1.7   | 634.1<br>$\pm$ 133.5 | 2.5   |
| <b>mTy1 RNA-Gag-p45</b> | 179<br>$\pm$ 20.9   | 1.9   | 227.9<br>$\pm$ 20   | 2     | 363.1<br>$\pm$ 56.2  | 1.9   | 469.9<br>$\pm$ 29.1  | 4.6   |
| <b>18S rRNA-Gag-p45</b> | 425<br>$\pm$ 95.1   | 1.5   | 514.7<br>$\pm$ 56.7 | 2.5   | 936<br>$\pm$ 239.7   | 2.6   | 891<br>$\pm$ 309.8   | 2.6   |

**Table S2.** Impact of RNA competitor on Ty1 Gag-p49 binding to mTy1 RNA and 18S rRNA analyzed by EMSA. Binding parameters for Ty1 Gag-RNA interactions were obtained based on quantitative analysis of gel images. Mean  $\pm$  SD of  $K_D$  from at least 3 independent EMSA experiments.

| Competitor \ Labeled RNA | mTy1 RNA            |       | 18S rRNA             |       |
|--------------------------|---------------------|-------|----------------------|-------|
|                          | $K_D$ [nM]          | $n_H$ | $K_D$ [nM]           | $n_H$ |
| <b>- competitor</b>      | 88.5<br>$\pm$ 3.6   | 1.5   | 261.5<br>$\pm$ 20.7  | 2.8   |
| <b>mTy1 RNA</b>          | 390.1<br>$\pm$ 34.7 | 2.3   | 752.7<br>$\pm$ 217.6 | 1.9   |
| <b>18S rRNA</b>          | 191.4<br>$\pm$ 33.1 | 1.7   | 1043<br>$\pm$ 124    | 1.3   |

**Figure S3.** Comparative analysis of the 3D structure of wild type mTy1 RNA and  $\Delta$ S1a RNA. Hydroxyl radical (HR) cleavage profiles and difference plot of protein free mTy1 RNA (black) in comparison with protein free  $\Delta$ S1a RNA (blue). On the difference plot, sites of decreased HR cleavage for  $\Delta$ S1a RNA are indicated by positive peaks. Regions important for Ty1 retrotransposition are boxed.

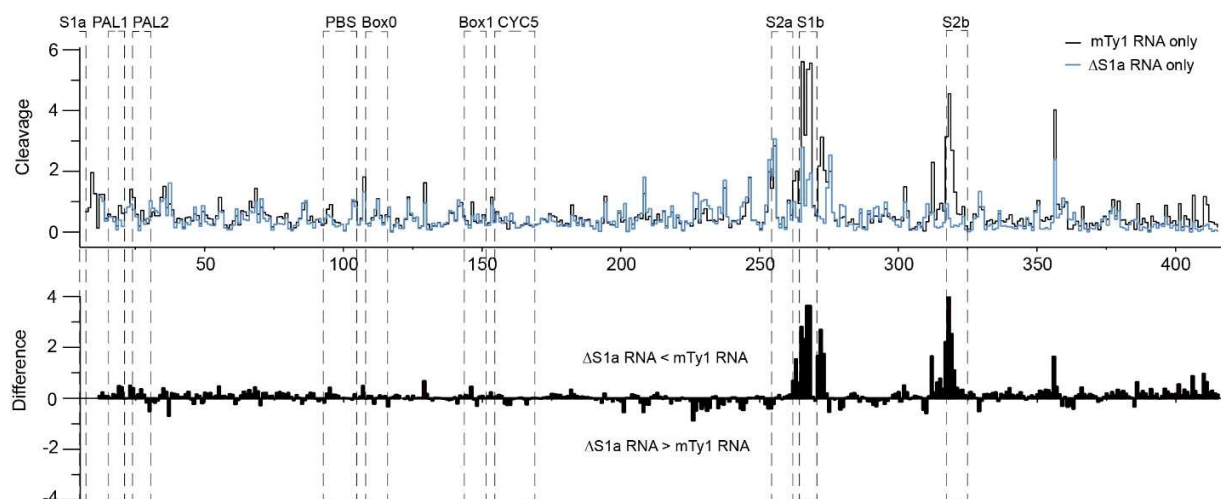

**Figure S4.** Frequency of nucleotide occurrence within Ty1 Gag-p49 binding sites and their vicinities represented as a logo (<http://weblogo.berkeley.edu/>).

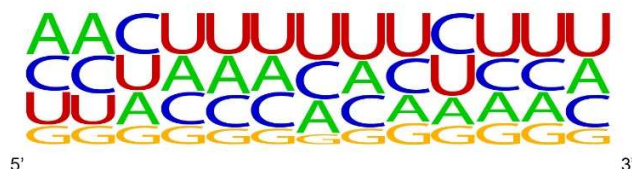

**Table S3.** Primers used for DNA templates construction.

| Primer              | Sequence                              |
|---------------------|---------------------------------------|
| F-miniRNA           | GATTTAGGTGACACTATAGAGGAGAACTTCTAGT    |
| R-miniRNA           | ACATTGGTGCTGGTCTGAC                   |
| $\Delta$ S1a_RNA_PF | GATTTAGGTGACACTATAGAACTTCTAGTATATT    |
| non-Psi Ty1_RNA_PF  | TAATACGACTCACTATAGGGTCAAAGACATCCTATCC |
| non-Psi Ty1_RNA_PR  | TTTACTGTAGATTGAGTAAGTTTCTGG           |
| 18S_rRNA_PF         | GATTTAGGTGACACTATAGTATCTGGTTGATCCT    |
| 18S_rRNA_PR         | CGCGGCTGCTGGCACCAGAC                  |
